# Supplementary material
Source: PubMed Central journal article supplement (PMC6768706)
Supplement: NIHMS1535807-supplement-Supplemental_Digital_Content_1.pdf [file NIHMS1535807-supplement-Supplemental_Digital_Content_1.pdf]

## **Appendix 1. Indications for Antibiotics and Corresponding ICD-9-CM Codes**

### **Cesarean delivery**

ICD-9-CM procedure code 74.x or diagnosis code 669.7x

### **Preterm premature rupture of membranes (requires two codes)**

ICD-9-CM diagnosis code 644.20 or 644.21 **and**

ICD-9-CM diagnosis code 658.10, 658.11, 658.13, 658.20, 658.21, or 658.23

### **Chorioamnionitis**

ICD-9-CM diagnosis 658.40, 658.41, or 658.43

### **Endometritis**

ICD-9-CM diagnosis 670.0x, 670.1x, or 670.2x

### **Group B streptococcus colonization**

ICD-9-CM diagnosis code V02.51

### **Infection**

ICD9 diagnosis codes for pyelonephritis, pneumonia, systemic inflammatory response syndrome, sepsis, acute appendicitis, urinary tract infection, cholecystitis, or diverticulitis

### **3<sup>rd</sup> and 4<sup>th</sup> degree vaginal lacerations**

ICD-9-CM diagnosis code 664.2x or 664.3x

### **Uterine tamponade**

ICD-9-CM procedure code 75.8

### **Manual placenta extraction**

ICD-9-CM procedure code 75.4

---

*ICD-9-CM* International Classification of Diseases, 9<sup>th</sup> Revision, Clinical Modification

## **Appendix 2. Antibiotics Included in Analysis**

---

### **Penicillins**

Amoxicillin  
Amoxicillin/clavulanic acid  
Ampicillin  
Ampicillin/sulbactam  
Benzylpenicillin (Penicillin G)  
Carbenicillin  
Cloxacillin  
Dicloxacillin  
Methicillin  
Nafcillin  
Oxacillin  
Penicillin  
Phenoxymethylpenicillin (Penicillin V)  
Piperacillin/tazobactam  
Ticaricillin/clavulanic acid

### **Cephalosporins**

#### **First generation**

Cephalothin  
Cephapirin  
Cephradine  
Cephalexin  
Cefazolin  
Cefadroxil

#### **Second generation**

Cefamandole  
Cefaclor  
Cefotetan  
Cefoxitin  
Cefuroxime  
Cefmetazole  
Cefonicid  
Cefprozil  
Loracarbef

#### **Third generation**

Andrikopoulou M, Huang Y, Duffy CR, Stern-Asher CN, Wright JN, Goffman D, et al. Antibiotic use without indication during delivery hospitalizations in the United States. *Obstet Gynecol* 2019;134.

The authors provided this information as a supplement to their article.

©2019 American College of Obstetricians and Gynecologists.

Ceftriaxone  
Ceftazidime  
Cefotaxime  
Ceftizoxime  
Ceftibuten  
Cefixime  
Cefperazone  
Cefpodoxime  
Cefdinir

**Fourth generation**

Cefepime

**Aminoglycosides**

Amikacin  
Gentamicin  
Tobramycin

**Carbapenems**

Doripenem  
Ertapenem  
Imipenem/cilastatin  
Meropenem

**Macrolides**

Azithromycin  
Clarithromycin  
Clindamycin  
Erythromycin  
Fidaxomicin  
Spiramycin

**Fluoroquinolones**

Ciprofloxacin  
Levofloxacin  
Moxifloxacin  
Ofloxacin

**Tetracyclines**

Doxycycline  
Tetracycline

Andrikopoulou M, Huang Y, Duffy CR, Stern-Asher CN, Wright JN, Goffman D, et al. Antibiotic use without indication during delivery hospitalizations in the United States. *Obstet Gynecol* 2019;134.

The authors provided this information as a supplement to their article.

©2019 American College of Obstetricians and Gynecologists.

**Others**

Metronidazole

Vancomycin

Aztreonam

Linezolid

Daptomycin

Chloramphenicol

Sulfamethoxazole/trimethoprim

Nitrofurantoin

Actinomycin

Rifampin

---

The antibiotics in the table were queried in the Perspective database for this analysis along with common trade names.

### Appendix 3. Use of Individual Antibiotics Among Women by Type of Delivery

| Antibiotics                                                | Number of patients | Percent of women (%) |
|------------------------------------------------------------|--------------------|----------------------|
| <b>Cesarean delivery</b>                                   |                    |                      |
| Cefazolin                                                  | 1,307,914          | 68.86                |
| Erythromycin                                               | 283,788            | 14.94                |
| Ampicillin                                                 | 175,933            | 9.26                 |
| Clindamycin                                                | 167,661            | 8.8                  |
| Cefoxitin                                                  | 124,195            | 6.5                  |
| Gentamicin                                                 | 91,234             | 4.8                  |
| Penicillin                                                 | 89,248             | 4.7                  |
| Cefotetan                                                  | 32,427             | 1.7                  |
| Azithromycin                                               | 28,661             | 1.5                  |
| Cephalexin                                                 | 22,516             | 1.2                  |
| Metronidazole                                              | 21,898             | 1.2                  |
| <b>Vaginal delivery (with indication for antibiotics)</b>  |                    |                      |
| Penicillin                                                 | 267,698            | 35.0                 |
| Ampicillin                                                 | 246,630            | 32.2                 |
| Erythromycin                                               | 133,419            | 17.4                 |
| Clindamycin                                                | 52,803             | 6.9                  |
| Gentamicin                                                 | 40,686             | 5.3                  |
| Cefazolin                                                  | 35,354             | 4.6                  |
| Vancomycin                                                 | 14,837             | 1.9                  |
| Azithromycin                                               | 14,078             | 1.8                  |
| Amoxicillin                                                | 9,711              | 1.3                  |
| <b>Vaginal delivery with no indication for antibiotics</b> |                    |                      |
| Erythromycin                                               | 467,585            | 16.3                 |
| Ampicillin                                                 | 222,834            | 7.8                  |
| Penicillin                                                 | 143,587            | 5.0                  |
| Cefazolin                                                  | 69,549             | 2.4                  |
| Clindamycin                                                | 42,375             | 1.5                  |
| Gentamicin                                                 | 30,877             | 1.1                  |

47 additional antibiotics were administered to <1% of women undergoing cesarean, 46 to women undergoing vaginal delivery with an indication for antibiotics, and 49 to vaginal delivery with no indication for antibiotics. Evidence-based diagnoses for administration of antibiotics includes preterm premature rupture of membranes, endometritis, chorioamnionitis, GBS colonization, and other infectious complications.

Andrikopoulou M, Huang Y, Duffy CR, Stern-Asher CN, Wright JN, Goffman D, et al. Antibiotic use without indication during delivery hospitalizations in the United States. *Obstet Gynecol* 2019;134.

The authors provided this information as a supplement to their article.

©2019 American College of Obstetricians and Gynecologists.

**Appendix 4. Adjusted and Unadjusted Models for Antibiotic Administration During Vaginal Delivery Hospitalizations With an Indication for Antibiotics**

|                              | Unadjusted model<br>risk ratio (95% CI) | Adjusted model<br>adjusted risk ratio (95% CI) |
|------------------------------|-----------------------------------------|------------------------------------------------|
| <b>Year</b>                  |                                         |                                                |
| 2006                         | Referent                                | Referent                                       |
| 2007                         | 0.99 (0.98, 0.99)**                     | 0.99 (0.98, 0.99)**                            |
| 2008                         | 0.97 (0.96, 0.97)**                     | 0.97 (0.97, 0.98)**                            |
| 2009                         | 0.97 (0.97, 0.98)**                     | 0.97 (0.97, 0.98)**                            |
| 2010                         | 0.96 (0.95, 0.96)**                     | 0.96 (0.96, 0.96)**                            |
| 2011                         | 0.96 (0.95, 0.96)**                     | 0.97 (0.96, 0.97)**                            |
| 2012                         | 0.95 (0.95, 0.96)**                     | 0.96 (0.96, 0.97)**                            |
| 2013                         | 0.95 (0.95, 0.95)**                     | 0.96 (0.95, 0.96)**                            |
| 2014                         | 0.92 (0.92, 0.92)**                     | 0.92 (0.92, 0.93)**                            |
| 2015 1 <sup>st</sup> quarter | 0.91 (0.90, 0.92)**                     | 0.92 (0.91, 0.92)**                            |
| <b>Age in years</b>          |                                         |                                                |
| 18-24                        | Referent                                | Referent                                       |
| 25-34                        | 0.97 (0.97, 0.97)**                     | 0.98 (0.98, 0.99)**                            |
| 35-39                        | 0.95 (0.95, 0.96)**                     | 0.97 (0.97, 0.98)**                            |
| ≥ 40                         | 0.95 (0.95, 0.96)**                     | 0.98 (0.97, 0.98)**                            |
| <b>Marital Status</b>        |                                         |                                                |
| Married                      | Referent                                | Referent                                       |
| Single                       | 1.03 (1.03, 1.03)**                     | 1.03 (1.02, 1.03)**                            |
| Other/Unknown                | 1.01 (1.01, 1.01)**                     | 1.00 (1.00, 1.01)                              |
| <b>Race</b>                  |                                         |                                                |
| White                        | Referent                                | Referent                                       |
| Black                        | 1.01 (1.01, 1.02)**                     | 1.00 (1.00, 1.00)                              |
| Other                        | 0.99 (0.98, 0.99)**                     | 0.99 (0.99, 0.99)**                            |
| Unknown                      | 0.95 (0.90, 1.00)*                      | 0.96 (0.91, 1.01)                              |
| <b>Payer</b>                 |                                         |                                                |
| Medicare                     | 1.02 (1.00, 1.03)*                      | 1.03 (1.01, 1.04)**                            |
| Medicaid                     | 1.02 (1.01, 1.02)**                     | 1.00 (1.00, 1.00)                              |
| Commercial                   | Referent                                | Referent                                       |
| Uninsured                    | 0.97 (0.96, 0.98)**                     | 0.97 (0.96, 0.98)**                            |
| Unknown                      | 0.98 (0.97, 0.99)**                     | 0.99 (0.98, 1.00)*                             |
| <b>Rurality</b>              |                                         |                                                |
| Urban                        | 1.06 (1.05, 1.06)**                     | 1.10 (1.10, 1.11)**                            |

Andrikopoulou M, Huang Y, Duffy CR, Stern-Asher CN, Wright JN, Goffman D, et al. Antibiotic use without indication during delivery hospitalizations in the United States. *Obstet Gynecol* 2019;134.

The authors provided this information as a supplement to their article.

©2019 American College of Obstetricians and Gynecologists.

|                         |                     |                     |
|-------------------------|---------------------|---------------------|
| Rural                   | Referent            | Referent            |
| Hospital Teaching       |                     |                     |
| No                      | Referent            | Referent            |
| Yes                     | 0.92 (0.92, 0.92)** | 0.91 (0.90, 0.91)** |
| Hospital Bed Size       |                     |                     |
| <400                    | Referent            | Referent            |
| 400-600                 | 0.99 (0.99, 1.00)** | 1.01 (1.01, 1.01)** |
| >600                    | 0.95 (0.95, 0.95)** | 1.01 (1.01, 1.02)** |
| Region of Hospital      |                     |                     |
| Northeastern            | Referent            | Referent            |
| Midwest                 | 1.24 (1.23, 1.24)** | 1.21 (1.21, 1.22)** |
| South                   | 1.12 (1.12, 1.13)** | 1.08 (1.08, 1.09)** |
| West                    | 1.12 (1.12, 1.13)** | 1.07 (1.07, 1.08)** |
| Postpartum hemorrhage   | 1.05 (1.04, 1.05)** | 1.05 (1.04, 1.05)** |
| Preeclampsia            | 1.03 (1.02, 1.03)** | 1.03 (1.02, 1.03)** |
| Gestational diabetes    | 1.00 (1.00, 1.01)   | 1.02 (1.01, 1.02)** |
| Pregestational diabetes | 1.03 (1.02, 1.04)** | 1.04 (1.03, 1.06)** |
| Multiple gestation      | 1.01 (1.00, 1.02)   | 1.02 (1.01, 1.03)*  |

Adjusted model includes all of the factors in the table as well as adjustment for hospital-level clustering. *CI*, confidence interval. \* $p < 0.05$ ; \*\* $p < 0.01$ . Evidence-based diagnoses for administration of antibiotics includes preterm premature rupture of membranes, endometritis, chorioamnionitis, GBS colonization, and other infectious complications.

**Appendix 5. Adjusted and Unadjusted Models for Antibiotic Administration During Cesarean Delivery Hospitalizations**

|                              | <b>Unadjusted model<br/>risk ratio (95% CI)</b> | <b>Adjusted model<br/>adjusted risk ratio (95% CI)</b> |
|------------------------------|-------------------------------------------------|--------------------------------------------------------|
| <b>Year</b>                  |                                                 |                                                        |
| 2006                         | Referent                                        | Referent                                               |
| 2007                         | 1.00 (0.99, 1.00)*                              | 1.00 (0.99, 1.00)*                                     |
| 2008                         | 0.99 (0.99, 0.99)**                             | 0.99 (0.99, 1.00)**                                    |
| 2009                         | 1.00 (1.00, 1.01)*                              | 1.01 (1.00, 1.01)**                                    |
| 2010                         | 1.03 (1.02, 1.03)**                             | 1.03 (1.02, 1.03)**                                    |
| 2011                         | 1.03 (1.03, 1.03)**                             | 1.03 (1.03, 1.04)**                                    |
| 2012                         | 1.04 (1.03, 1.04)**                             | 1.04 (1.04, 1.04)**                                    |
| 2013                         | 1.04 (1.03, 1.04)**                             | 1.03 (1.03, 1.04)**                                    |
| 2014                         | 1.03 (1.03, 1.03)**                             | 1.02 (1.02, 1.03)**                                    |
| 2015 1 <sup>st</sup> quarter | 1.03 (1.02, 1.03)**                             | 1.02 (1.02, 1.03)**                                    |
| <b>Age in years</b>          |                                                 |                                                        |
| 18-24                        | Referent                                        | Referent                                               |
| 25-34                        | 0.97 (0.97, 0.97)**                             | 0.99 (0.99, 0.99)**                                    |
| 35-39                        | 0.95 (0.95, 0.95)**                             | 0.98 (0.98, 0.99)**                                    |
| ≥ 40                         | 0.94 (0.94, 0.94)**                             | 0.98 (0.98, 0.98)**                                    |
| <b>Marital Status</b>        |                                                 |                                                        |
| Married                      | Referent                                        | Referent                                               |
| Single                       | 1.02 (1.02, 1.02)**                             | 1.01 (1.01, 1.01)**                                    |
| Other/Unknown                | 0.98 (0.98, 0.98)**                             | 0.98 (0.98, 0.98)**                                    |
| <b>Race</b>                  |                                                 |                                                        |
| White                        | Referent                                        | Referent                                               |
| Black                        | 1.01 (1.01, 1.01)**                             | 1.00 (1.00, 1.00)*                                     |
| Other                        | 0.96 (0.96, 0.96)**                             | 0.98 (0.98, 0.98)**                                    |
| Unknown                      | 1.04 (1.02, 1.06)**                             | 1.01 (1.00, 1.03)                                      |
| <b>Payer</b>                 |                                                 |                                                        |
| Medicare                     | 1.02 (1.02, 1.03)**                             | 1.03 (1.03, 1.04)**                                    |
| Medicaid                     | 1.04 (1.03, 1.04)**                             | 1.01 (1.01, 1.01)**                                    |
| Commercial                   | Referent                                        | Referent                                               |
| Uninsured                    | 1.03 (1.02, 1.03)**                             | 1.01 (1.01, 1.01)**                                    |
| Unknown                      | 1.01 (1.01, 1.02)**                             | 1.00 (1.00, 1.00)                                      |
| <b>Rurality</b>              |                                                 |                                                        |
| Urban                        | 0.97 (0.97, 0.97)**                             | 1.02 (1.02, 1.02)**                                    |

Andrikopoulou M, Huang Y, Duffy CR, Stern-Asher CN, Wright JN, Goffman D, et al. Antibiotic use without indication during delivery hospitalizations in the United States. *Obstet Gynecol* 2019;134.

The authors provided this information as a supplement to their article.

©2019 American College of Obstetricians and Gynecologists.



|                         |                     |                     |
|-------------------------|---------------------|---------------------|
| Rural                   | Referent            | Referent            |
| Hospital Teaching       |                     |                     |
| No                      | Referent            | Referent            |
| Yes                     | 0.92 (0.92, 0.92)** | 0.97 (0.97, 0.97)** |
| Hospital Bed Size       |                     |                     |
| <400                    | Referent            | Referent            |
| 400-600                 | 0.95 (0.95, 0.96)** | 0.97 (0.97, 0.97)** |
| >600                    | 0.93 (0.93, 0.94)** | 0.98 (0.97, 0.98)** |
| Region of Hospital      |                     |                     |
| Northeastern            | Referent            | Referent            |
| Midwest                 | 1.29 (1.29, 1.30)** | 1.27 (1.27, 1.28)** |
| South                   | 1.30 (1.29, 1.30)** | 1.27 (1.27, 1.27)** |
| West                    | 1.23 (1.23, 1.24)** | 1.20 (1.20, 1.21)** |
| Postpartum hemorrhage   | 1.02 (1.02, 1.03)** | 1.03 (1.03, 1.03)** |
| Preeclampsia            | 1.01 (1.00, 1.01)** | 1.00 (1.00, 1.00)   |
| Gestational diabetes    | 1.00 (0.99, 1.00)*  | 1.00 (1.00, 1.01)*  |
| Pregestational diabetes | 1.02 (1.01, 1.02)** | 1.01 (1.01, 1.02)** |
| Multiple gestation      | 0.99 (0.99, 0.99)** | 0.99 (0.99, 1.00)*  |

Adjusted model includes all of the factors in the table as well as adjustment for hospital-level clustering. *CI*, confidence interval. \* $p < 0.05$ ; \*\* $p < 0.01$ . Evidence-based diagnoses for administration of antibiotics includes preterm premature rupture of membranes, endometritis, chorioamnionitis, GBS colonization, and other infectious complications.

Appendixes 6–8 demonstrate the proportion of women each year receiving antibiotics based on vaginal versus cesarean delivery, and if vaginal delivery occurred whether there was an evidence-based diagnosis for administering antibiotics including preterm premature rupture of membranes, endometritis, chorioamnionitis, GBS colonization, and other infectious complications. Only hospitals that contributed data over the entire study period are included in this analysis.

**Appendix 6. Proportion of women by year receiving antibiotics with vaginal delivery (no indication for antibiotics).**

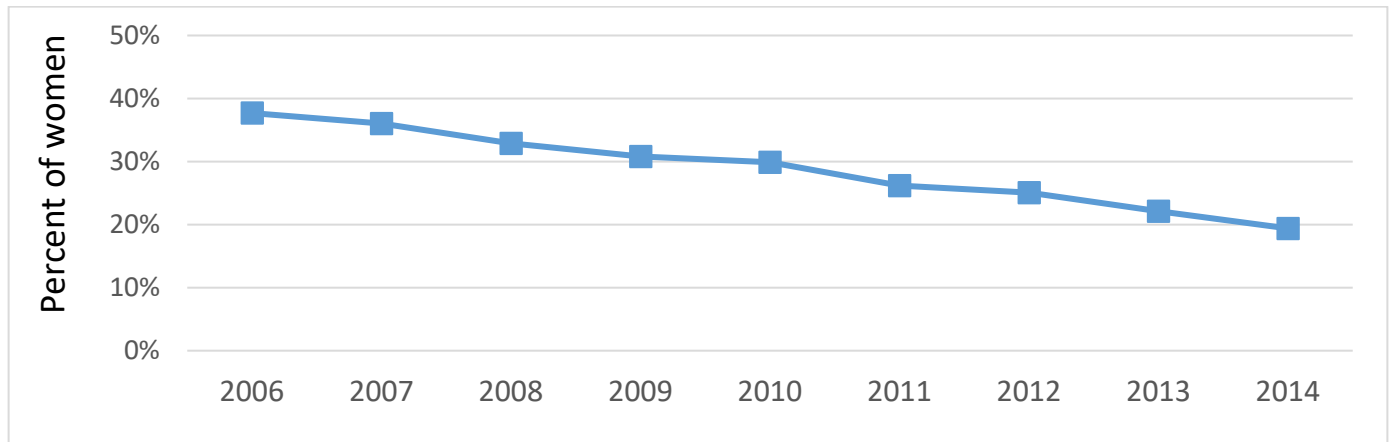

Andrikopoulou M, Huang Y, Duffy CR, Stern-Asher CN, Wright JN, Goffman D, et al. Antibiotic use without indication during delivery hospitalizations in the United States. *Obstet Gynecol* 2019;134.

The authors provided this information as a supplement to their article.

©2019 American College of Obstetricians and Gynecologists.

**Appendix 7. Proportion of women by year receiving antibiotics with vaginal delivery (indication for antibiotics).**

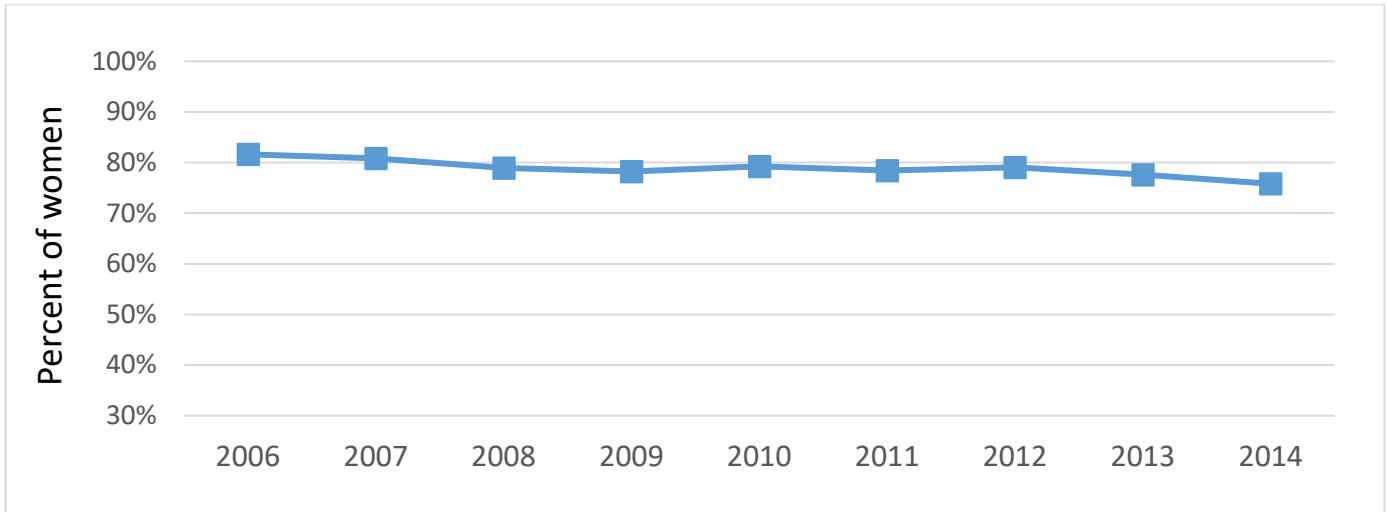

Andrikopoulou M, Huang Y, Duffy CR, Stern-Asher CN, Wright JN, Goffman D, et al. Antibiotic use without indication during delivery hospitalizations in the United States. *Obstet Gynecol* 2019;134.

The authors provided this information as a supplement to their article.

©2019 American College of Obstetricians and Gynecologists.

**Appendix 8. Proportion of women by year receiving antibiotics with cesarean delivery.**

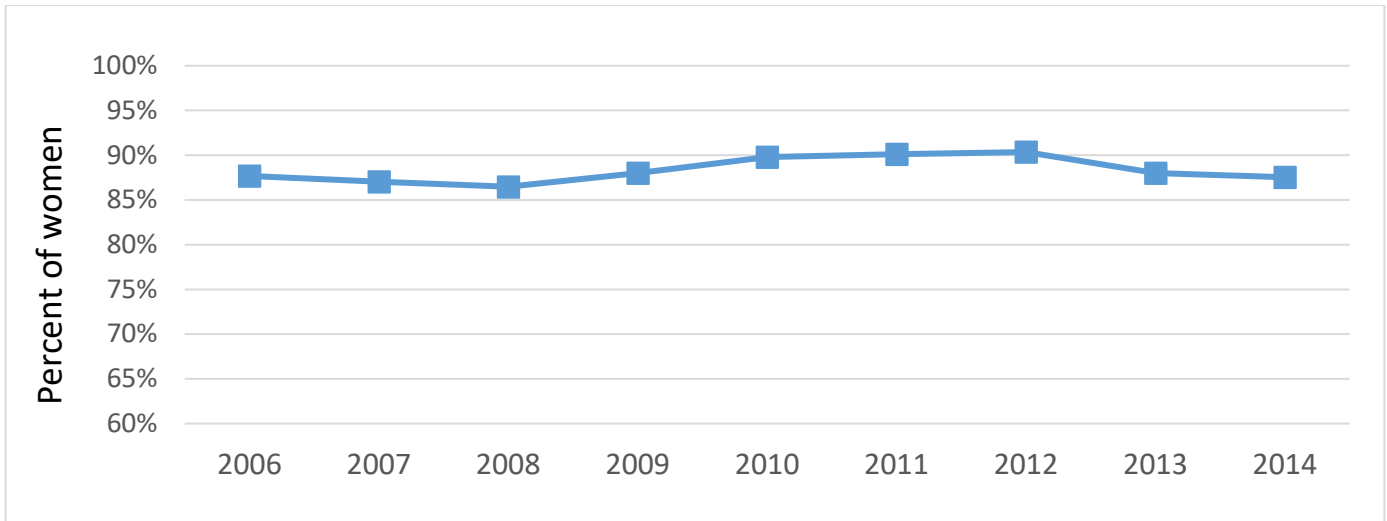

Andrikopoulou M, Huang Y, Duffy CR, Stern-Asher CN, Wright JN, Goffman D, et al. Antibiotic use without indication during delivery hospitalizations in the United States. *Obstet Gynecol* 2019;134.

The authors provided this information as a supplement to their article.

©2019 American College of Obstetricians and Gynecologists.

**Appendix 9. Proportion of women by year receiving antibiotics excluding erythromycin with vaginal delivery (without an indication for antibiotics) with additional exclusions. This figure demonstrates the proportion of women each year receiving antibiotics excluding erythromycin who underwent vaginal delivery without an evidence-based diagnosis for administering antibiotics. Women with penicillin allergy are excluded from this sensitivity analysis. Women with premature rupture of membranes, preterm delivery, preterm labor, and delayed or prolonged labor were additionally excluded.**

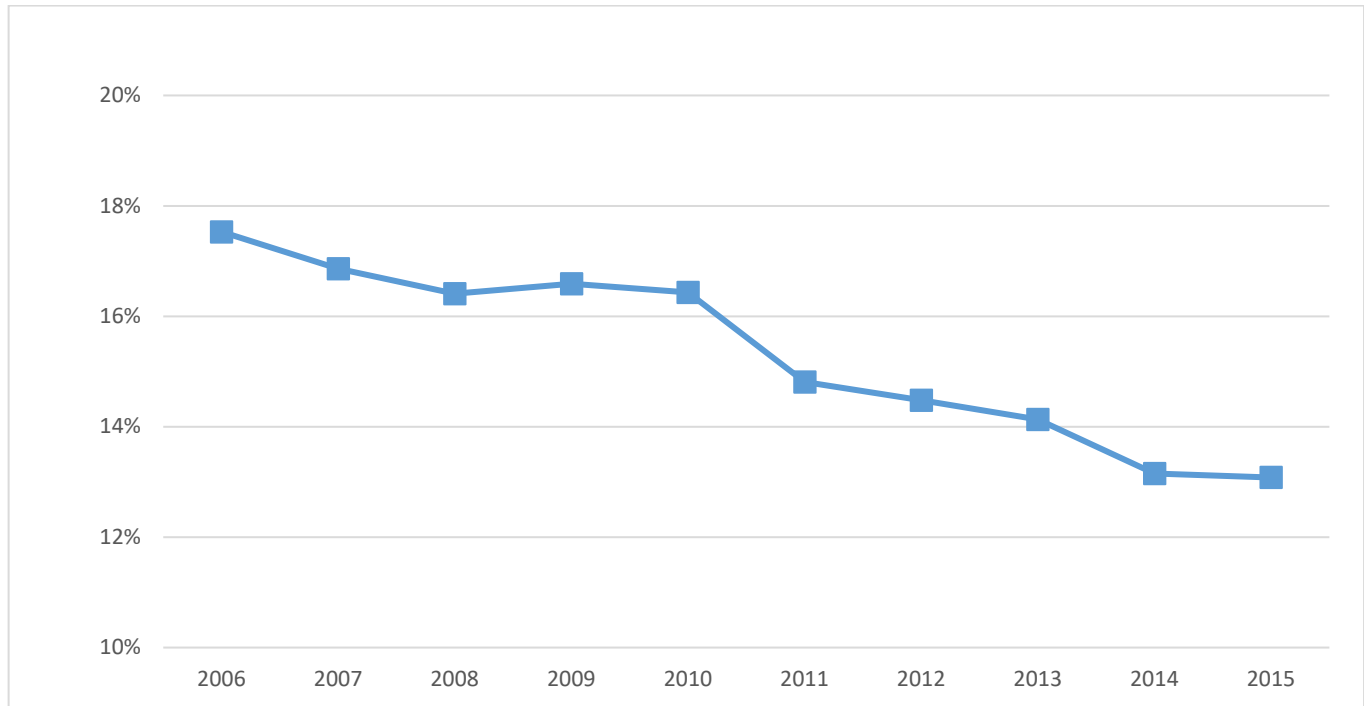

Andrikopoulou M, Huang Y, Duffy CR, Stern-Asher CN, Wright JN, Goffman D, et al. Antibiotic use without indication during delivery hospitalizations in the United States. *Obstet Gynecol* 2019;134.

The authors provided this information as a supplement to their article.

©2019 American College of Obstetricians and Gynecologists.
